# Supplementary material
Source: publisher figshare collection journal article supplement (https://gsajournals.figshare.com/ndownloader/files/26393896)
Supplement: Supplementary file 1 [file 26393896]

## Sheet: Table S2
Table S2 - C. elegans lines expressing single-copy of wrmScarlet1-10 and/or sfGFP1-10
Strain	Genotype	Description	Genomic position	Genetic Position	Sequence
CF4582	muIs252[Peft-3::wrmScarlet1-10::unc-54 3'UTR Cbr-unc-119(+)] II; unc-119(ed3) III	Somatic wrmScarlet1-10 (eft-3 promoter)	II: 9.83 MB	II:1.73	gcacctttggtcttttattgtcaacttccattggttcttccattgtttctgttaaattaatgaatttttcataaaataaagacattatacaatataaaaatgaagaatttattgaaaataaactgccagagagaaaaagtatgcaacactcccgccgagagtgtttgaaatggtgtacggtacattttcgtgctaggagttagatgtgcaggcagcaacgagagggggagagatttttttgggccttgtgaaattaacgtgagttttctggtcatctgactaatcatgttggttttttgttggtttattttgtttttatctttgtttttatccagattaggaaatttaaattttatgaatttataatgaggtcaaacattcagtcccagcgtttttcct…
CF4587	muIs253[(Peft-3::sfGFP1-10::unc-54 3'UTR Cbr-unc-119(+)] II; unc-119(ed3) III	Somatic sfGFP1-10 (eft-3 promoter)	II: 8.42 MB	II:0.77	gcacctttggtcttttattgtcaacttccattggttcttccattgtttctgttaaattaatgaatttttcataaaataaagacattatacaatataaaaatgaagaatttattgaaaataaactgccagagagaaaaagtatgcaacactcccgccgagagtgtttgaaatggtgtacggtacattttcgtgctaggagttagatgtgcaggcagcaacgagagggggagagatttttttgggccttgtgaaattaacgtgagttttctggtcatctgactaatcatgttggttttttgttggtttattttgtttttatctttgtttttatccagattaggaaatttaaattttatgaatttataatgaggtcaaacattcagtcccagcgtttttcct…
CF4588	muIs253[Peft-3::sfGFP1-10::unc-54 3'UTR Cbr-unc-119(+)] muIs252[Peft-3::wrmScarlet1-10::unc-54 3'UTR Cbr-unc-119(+)] II; unc-119(ed3) III	Somatic sfGFP1-10 and somatic wrmScarlet1-10 (eft-3 promoter)	II: 8.42 MB & 9.83 MB	II:0.77 1.73	Sequences from CF4582 and CF4587
CF4610	muIs257[Pmyo-3::wrmScarlet1-10::unc-54 3'UTR] I	Muscle wrmScarlet1-10 (myo-3 promoter)	I: 2.85 MB	I:-5.32	agtgattatagtctctgttttcgttaattttgaattttgcttgataaggctgcaacaaagatcaggttgacatatattttcagtaatttattttaacctgtactctatcactgccggctataataagttcttgaataaaataattttcccgacaaaacatgagtatttctttcgaaaataaaagtgcaggctaattagagattattctgtaattaactgcataatttgtcacgtgccatagttttacattccactacgtcatagttcttaaaatactaatctcctgaaaatagaagtaggtgaagaaagtttaattatcagttctaaaatgacaattgatctttggaatatgttctgaaactaccgatcattgaacagatgctatttgaatgatataga…
DUP223	glh-1(sam129[glh-1::T2A::sGFP2(1-10)]) I	Germline sGFP2(1-10)	I: 6.85 MB	I: 1.41	gtttcgccacgcgccccaactacagtaacctcgacacactcatctactaaattttgggacagttcctaattctttttgctgttttcaactcaattttctggaaaaatcttaattttctgcgaaaATGTCTGATGGTTGGAGTGATAGCGAAAGTGCTGCTAAGGgtgagttttattttgaactttccaccggttttattttgattaaaaactttatttcagCCAAAACTGGATTCGGTAGTGGAGGCGGTTTCGGTGGTGGTAACAATGGAGGATCTGGGTTTGGTGGTGGTAAAAATGGAGGTACTGGATTCGGTGGAGGAAACACTGGCGGATCTGGATTCGGTGGAGGAAACACTGGCGGATCTGGATTCGGTGGAGGAAAGACTGGCGGTTCTGG…
DUP237	glh-1(sam140[glh-1::T2A::wrmScarlet(1-10)]) I	Germline wrmScarlet(1-10)	I: 6.85 MB	I: 1.41	gtttcgccacgcgccccaactacagtaacctcgacacactcatctactaaattttgggacagttcctaattctttttgctgttttcaactcaattttctggaaaaatcttaattttctgcgaaaATGTCTGATGGTTGGAGTGATAGCGAAAGTGCTGCTAAGGgtgagttttattttgaactttccaccggttttattttgattaaaaactttatttcagCCAAAACTGGATTCGGTAGTGGAGGCGGTTTCGGTGGTGGTAACAATGGAGGATCTGGGTTTGGTGGTGGTAAAAATGGAGGTACTGGATTCGGTGGAGGAAACACTGGCGGATCTGGATTCGGTGGAGGAAACACTGGCGGATCTGGATTCGGTGGAGGAAAGACTGGCGGTTCTGG…
